# Supplementary material
Source: publisher figshare collection journal article supplement (https://acs.figshare.com/ndownloader/files/9537826)
Supplement: Supplementary file 1 [file 9537826]

## Electronic Supplementary Information (ESI)

### **Lithiated Polycalix[4]arenes for Efficient Adsorption of Iodine from Solution and Vapor Phases**

Dinesh Shetty,<sup>†</sup> Jesus Raya,<sup>‡</sup> Dong Suk Han,<sup>§</sup> Zouhair Asfari,<sup>||</sup> John-Carl Olsen<sup>¶</sup> and Ali Trabolsi<sup>†,\*</sup>

<sup>a</sup>New York University Abu Dhabi (NYUAD), The Experimental Research Building (C1), Saadiyat Island Abu Dhabi, United Arab Emirates.

<sup>b</sup>CNRS/Université de Strasbourg 1, rue Blaise Pascal, Strasbourg – FRANCE 67000.

<sup>c</sup>Chemical Engineering Program, Texas A&M University at Qatar, Education City, Doha, Qatar

<sup>d</sup>Institut Pluridisciplinaire Hubert Curien, Laboratoire de Chimie Analytique et Sciences Séparatives, 67087 Strasbourg Cedex, France.

<sup>e</sup>Department of Chemistry, RC Box 270216, University of Rochester, Rochester, NY, 14627

Email: ali.trabolsi@nyu.edu

**General.** All the chemicals and solvents were purchased from Sigma-Aldrich and used without further purification. Deionized water was used from Millipore Gradient Milli-Q water purification system. Thin-layer chromatography (TLC) was performed on silica gel 60 F254 (E. Merck). The plates were inspected with UV light. Column chromatography was performed on silica gel 60F (Merck 9385, 0.040–0.063 mm). Routine nuclear magnetic resonance (NMR) spectra were recorded at 25 °C on a Bruker Avance spectrometer, with working frequencies of 500 MHz for  $^1\text{H}$ , and 125.7 MHz for  $^{13}\text{C}$  nuclei, respectively. All chemical shifts are reported in ppm relative to the signals corresponding to the residual non-deuterated solvent ( $\text{DMSO-d}_6$ :  $\delta = 2.50$  ppm).

**Materials characterization.** FTIR studies were carried out on Agilent 670-IR spectrometer. TGA experiments were performed on a TA SDT Q600. SEM images were obtained from FEI Quanta 450FEG. TEM images were obtained from a FEI-Titan 300. Solid-state cross-polarization magic angle spinning (CP/MAS)  $^{13}\text{C}$  NMR spectra of the polymers were recorded on a Bruker Avance 500 Wide Bore (500MHz) NMR spectrometer at ambient temperature with a magic angle spinning rate of 18.0 kHz. Solid-state magic angle spinning  $^7\text{Li}$ -MAS NMR spectra of the polymers were recorded on a Bruker Avance-I (300MHz) NMR spectrometer at resonance frequency 107.7 MHz. We used a MAS double resonance probe designed for 4 mm o.d. zirconia spinners, and all the sample were spun at 10 kHz, at room temperature. UV-Vis studies were carried out on Cary 5000 UV-Vis-NIR spectrophotometer. All UV-Vis spectra were recorded at room temperature using a quartz cell with 10 mm or 1 mm path length over the range 200–800 nm and corrected against an appropriate background spectrum. Surface area measurements were conducted on a Micromeritics 3Flex gas sorption analyzer. Samples (50–150 mg) were degassed at 85 °C for 24 h and then backfilled with  $\text{N}_2$ . Adsorption isotherms were generated by incremental exposure to ultrahigh-purity nitrogen up to 1 atm in a liquid nitrogen bath, and surface parameters were determined using BET adsorption models included in the instrument software (Micromeritics ASAP 2020 V4.00). The elemental information and oxidation states of Li in the solid samples were analyzed using X-ray Photoelectron spectroscopy (XPS, Kratos AXIS UltraDLD). High resolution of I 3d and Li 1s XPS spectra was collected using monochromatic Al K $\alpha$  (1486 eV) X-ray source at 40 eV or 20 eV of pass energy with 4 sweeps and then calibrated with 483.5 eV

of C 1s XPS spectra, while a wide survey scan of the solid samples was collected at pass energy of 80 eV with 2 sweeps for identification of the all elemental information.

### Synthesis of 5,11,17,23-Tetrabromo-25,26,27,28-tetrahydrocalix[4]arene (**1**).<sup>1</sup>

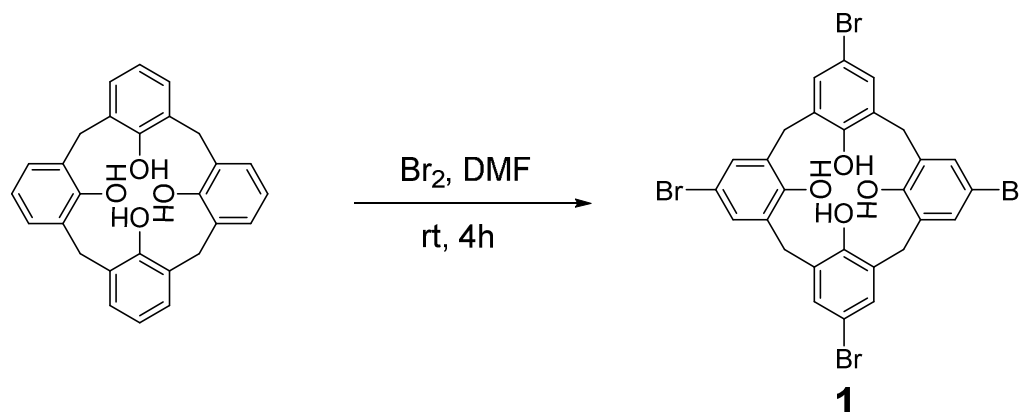

Bromine (0.4 mL, 7.84 mol) in DMF (5 mL) was added dropwise with stirring to a solution of calix[4]arene (0.5 g, 1.18 mmol) in DMF (20 mL). The solution was stirred for 4 h. A precipitate began to form after about 0.5 h. After the 4 h of reaction, methanol (20 mL) was added, and the mixture was left to stir for an additional 0.5 h. The precipitate was filtered off and washed with methanol to yield the brominated product, **1** (0.75 g, 87%) as a white solid.  $^1\text{H}$  NMR ( $[\text{D}_6]\text{DMSO}$ , 25 °C, 500 MHz):  $\delta$  = 7.34 (s, 8H), 3.81 ppm (br s, 8H).  $^{13}\text{C}$  NMR ( $[\text{D}_6]\text{DMSO}$ , 25 °C, 125.7 MHz):  $\delta_{\text{c}}$  = 151.8, 131.98, 131.08, 110.89, 30.94 ppm.

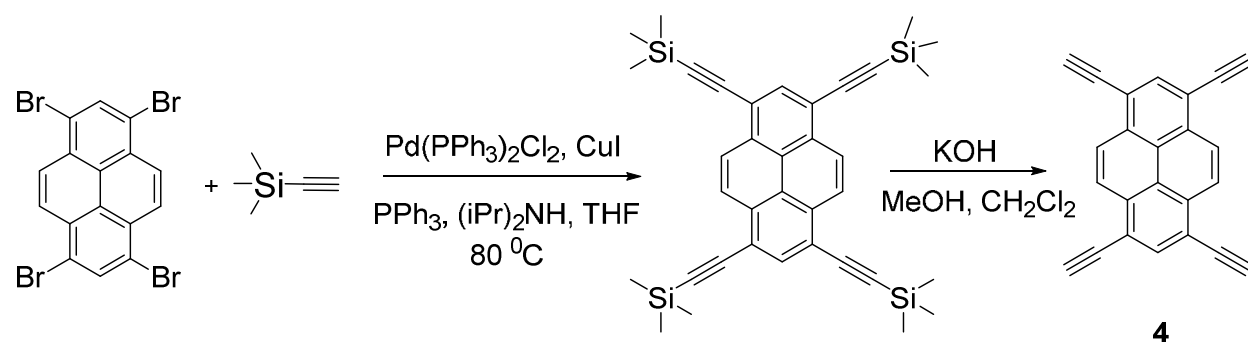

**1,3,6,8-Tetrakis(trimethylsilyl)ethynylpyrene.**<sup>2</sup> Compound 1,3,6,8-Tetrabromopyrene (1.0 g, 1.93 mmol),  $[\text{PdCl}_2(\text{PPh}_3)_2]$  (67 mg, 0.096 mmol),  $\text{CuI}$  (18 mg, 0.096 mmol),  $\text{PPh}_3$  (50 mg, 0.193

mmol), and the terminal alkyne (11.6 mmol) were added to a degassed solution of diisopropylamine (20 mL) and THF (20 mL) under argon. The resulting mixture was stirred at 70 °C for 48 h. The reaction mixture was then cooled to room temperature and solvent was removed to give the crude reaction mixture. Column chromatographic purification of the crude product on silica gel with hexane as the eluent yielded a red orange solid (0.72 g, 66%). <sup>1</sup>H NMR (CDCl<sub>3</sub>, 25 °C, 500 MHz): δ = 8.51 (s, 4 H), 8.26 (s, 2 H), 0.37 (s, 36 H) ppm. <sup>13</sup>C NMR (CDCl<sub>3</sub>, 25 °C, 125.7 MHz): δ = 134.5, 131.9, 126.8, 123.4, 118.5, 102.8, 101.3, 0.1 ppm.

**1,3,6,8-Tetraethynylpyrene (4).** To remove the silyl-protection groups, the filtrate was dissolved in ethanol (500 mL) in the presence of KOH (5 g), and stirred overnight. Two-thirds of solvent was removed by evaporation, and gradual addition of water gave a pale brownish precipitate. It was extracted using methylene chloride several times. Removal of the solvent gave the product **1** <sup>1</sup>H NMR ([D<sub>8</sub>]THF, 25 °C, 500 MHz): δ = 8.68 (s, 4 H), 8.34 (s, 2 H), 4.28 (s, 4 H) ppm. <sup>13</sup>C NMR ([D<sub>8</sub>]THF, 25 °C, 125.7 MHz): δ = 135.7, 132.6, 127.3, 123.5, 119.1, 86.3, 81.9 ppm.

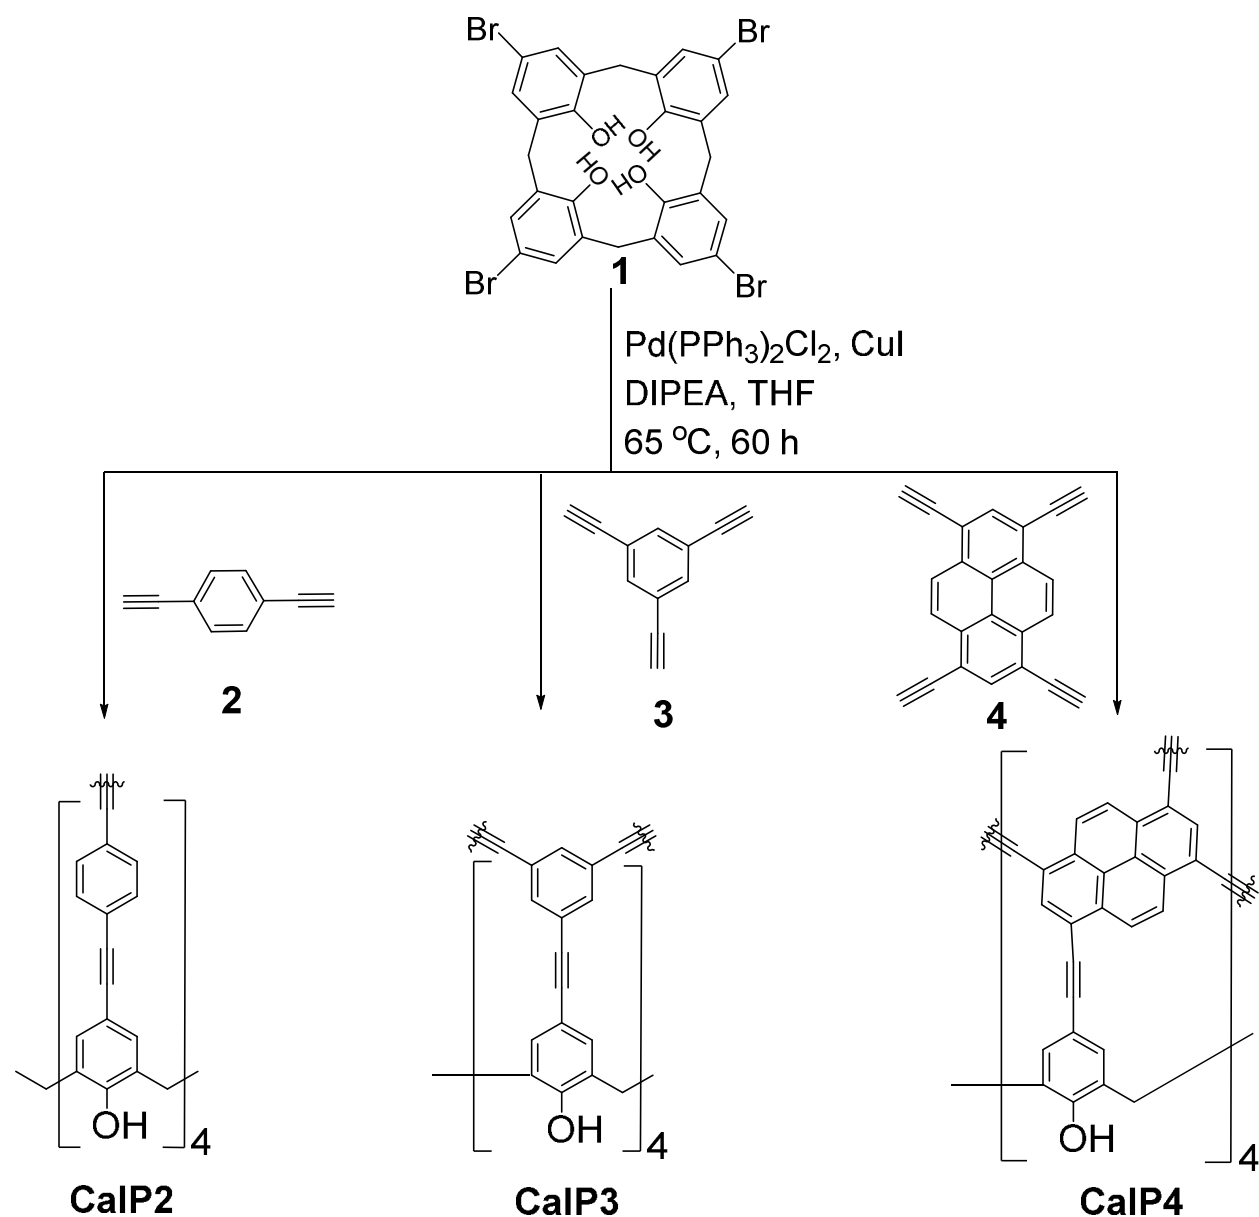

**General procedure for the synthesis of polymer.** A solution of 5,11,17,23-Tetrabromo-25,26,27,28-tetrahydroxycalix[4]arene, bis(triphenylphosphine)palladium(II) chloride, and copper(I) iodide in anhydrous THF were placed in a 250 mL two-neck round-bottom flask equipped with a condenser. Diisopropylamine and alkyne were loaded into a separate 50 mL flask. Both solutions were purged with argon for at least 15 min. The ethynyl-compound solution was then added dropwise over 5 min to the calixarene solution with stirring to afford a dark brown reaction mixture after 5 min. The reaction was heated at  $65^\circ\text{C}$  under argon for 60 h. After cooling to room temperature, the solid product was centrifuged and washed with excess

(cold and hot) THF, DMA, CHCl<sub>3</sub>, EtOH, and (cold and hot) H<sub>2</sub>O to remove any unreacted monomers and metal catalyst residues. The final products were dried under a vacuum for 16 h at 60 °C.

**CalP2:** 5,11,17,23-Tetrabromo-25,26,27,28-tetrahydroxycalix[4]arene (1.0 g, 1.36 mmol), 1,4-diethynylbenzene (0.34 g, 2.72 mmol), bis(triphenylphosphine)palladium(II) chloride (0.285 g, 0.45 mmol), copper(I) iodide (0.13 g, 0.68 mmol), Diisopropylamine (1 mL), and tetrahydrofuran (100 mL).

**CalP3:** 5,11,17,23-Tetrabromo-25,26,27,28-tetrahydroxycalix[4]arene (1.0 g, 1.36 mmol), 1,3,5-triethynylbenzene (0.275 g, 1.8 mmol), bis(triphenylphosphine)palladium(II) chloride (0.285 g, 0.45 mmol), copper(I) iodide (0.13 g, 0.68 mmol), Diisopropylamine (1 mL), and tetrahydrofuran (100 mL).

**CalP4:** 5,11,17,23-Tetrabromo-25,26,27,28-tetrahydroxycalix[4]arene (1.0 g, 1.36 mmol), 1,3,6,8-Tetraethynylpyrene (0.405 g, 1.36 mmol), bis(triphenylphosphine)palladium(II) chloride (0.285 g, 0.45 mmol), copper(I) iodide (0.13 g, 0.68 mmol), Diisopropylamine (1 mL), and tetrahydrofuran (160 mL).

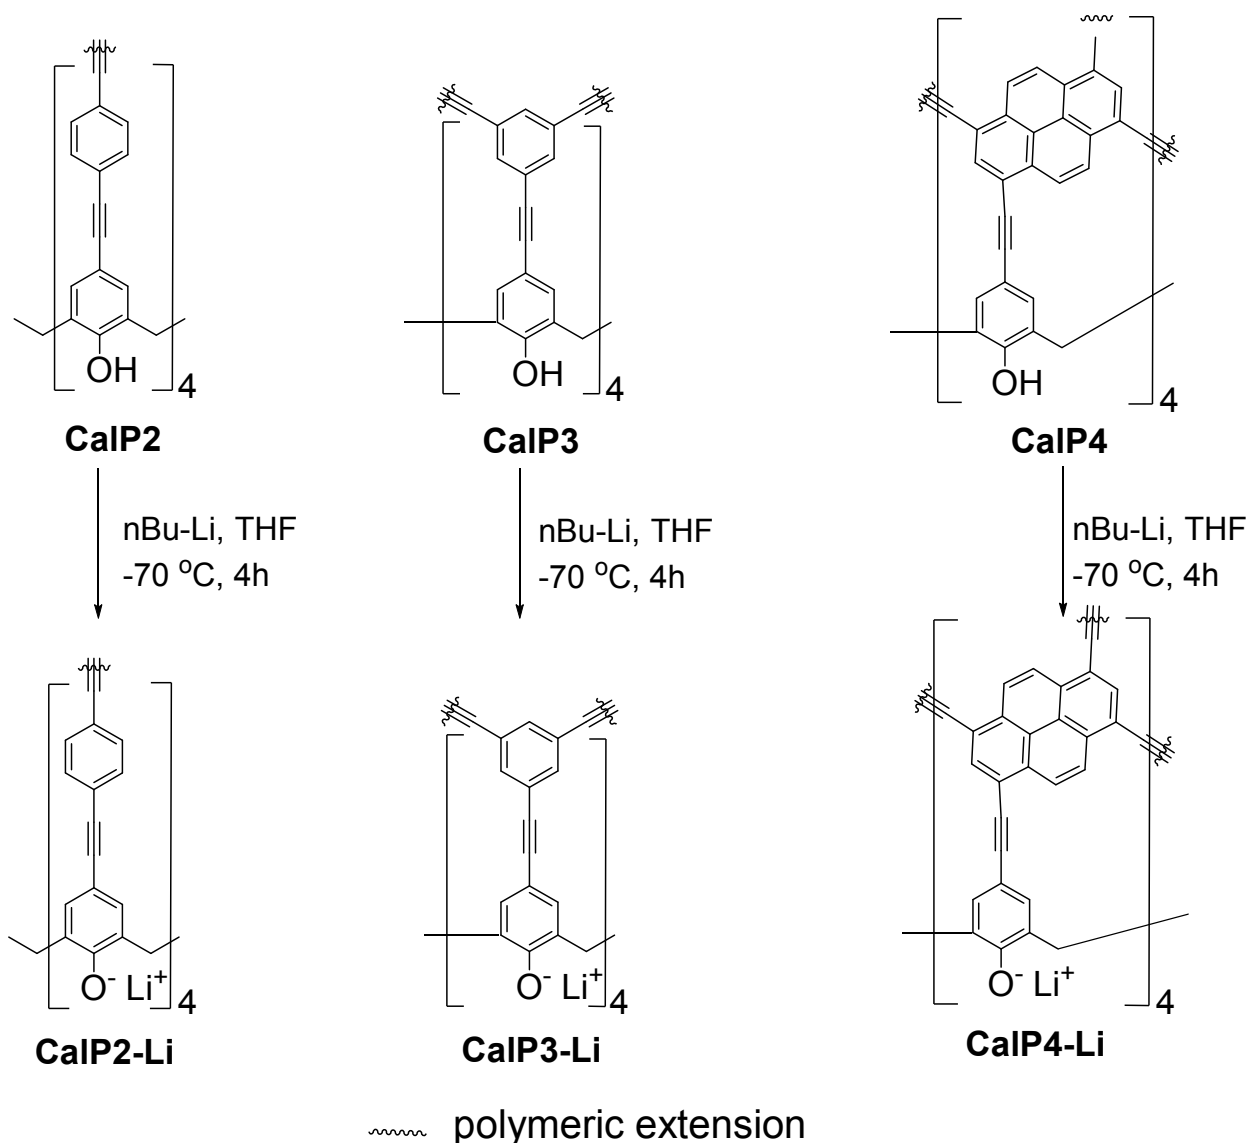

**General procedure for the synthesis of lithiated-polymer.** 0.2 g of each polymer (CalP2, CalP3, or CalP4) was immersed in anhydrous THF under argon atmosphere. The reaction mixture was stirred vigorously and cooled to -70 °C. 3 mL of 2.0 M n-butyl lithium in cyclohexene was introduced slowly to the reaction flask while maintaining the temperature at -78 °C and continued stirring at same temperature for 4h. After bringing the reaction flasks to room temperature, solid polymer was centrifuged and washed with anhydrous THF for 5 times. The resulting solid was dried under inert atmosphere and heated to 120 °C for 16 h to remove the trapped impurities.

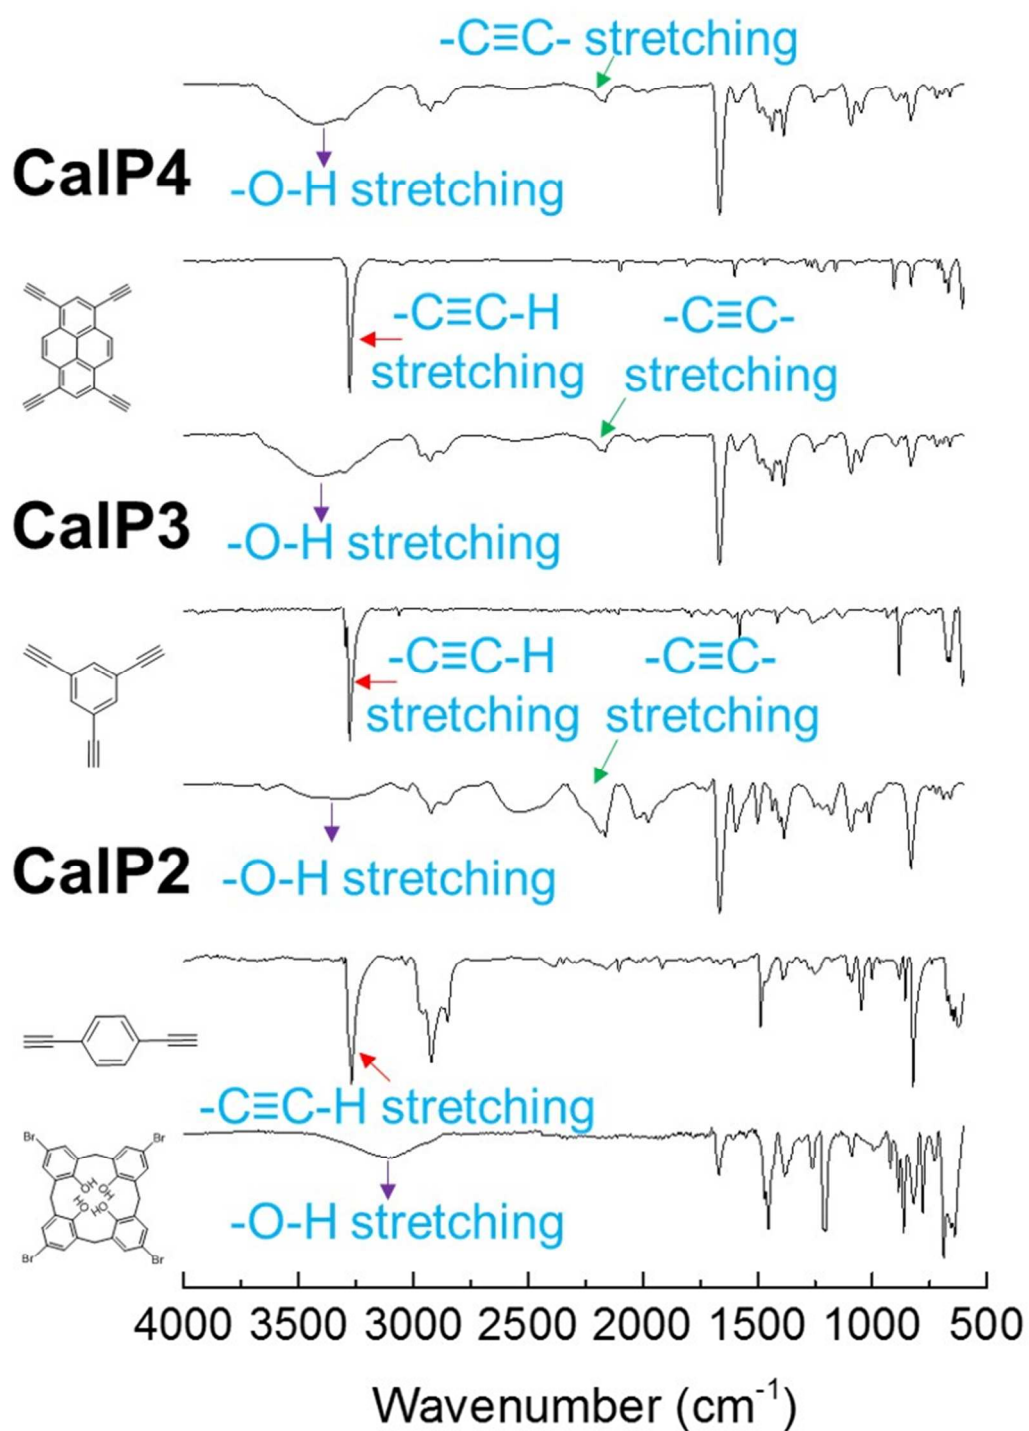

**Figure S1.** FTIR spectra of CalP2, CalP3, CalP4, and corresponding monomers.



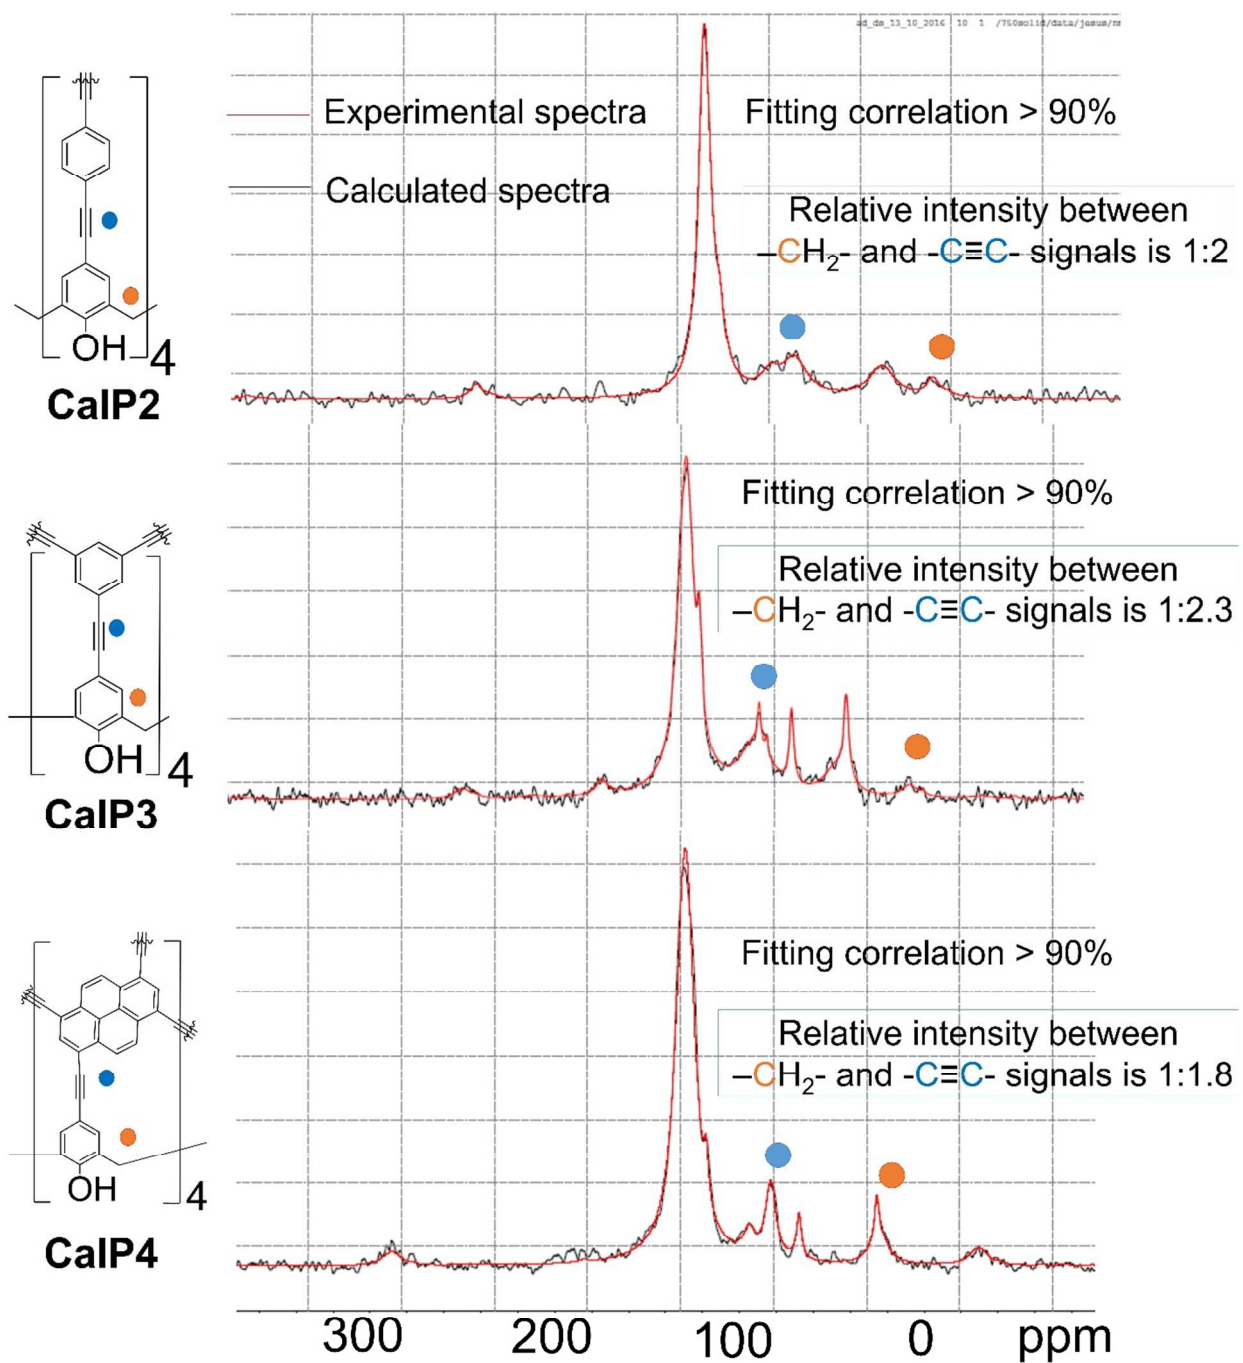

**Figure S2.**  $^{13}\text{C}$  DP/MAS NMR spectrum of **CalP $n$**  ( $n = 2-4$ ). Experimental spectra and calculated fitting with solid-state NMR parameters that shows over 90% overlap during the interpretation of NMR signals indicate the relative peak intensity between methylene ( $-\text{CH}_2-$ , orange) carbons of calix[4]arene and acetylene carbons ( $-\text{C}\equiv\text{C}-$ , blue) conjugated to the macrocycle is  $\sim 1:2$ .

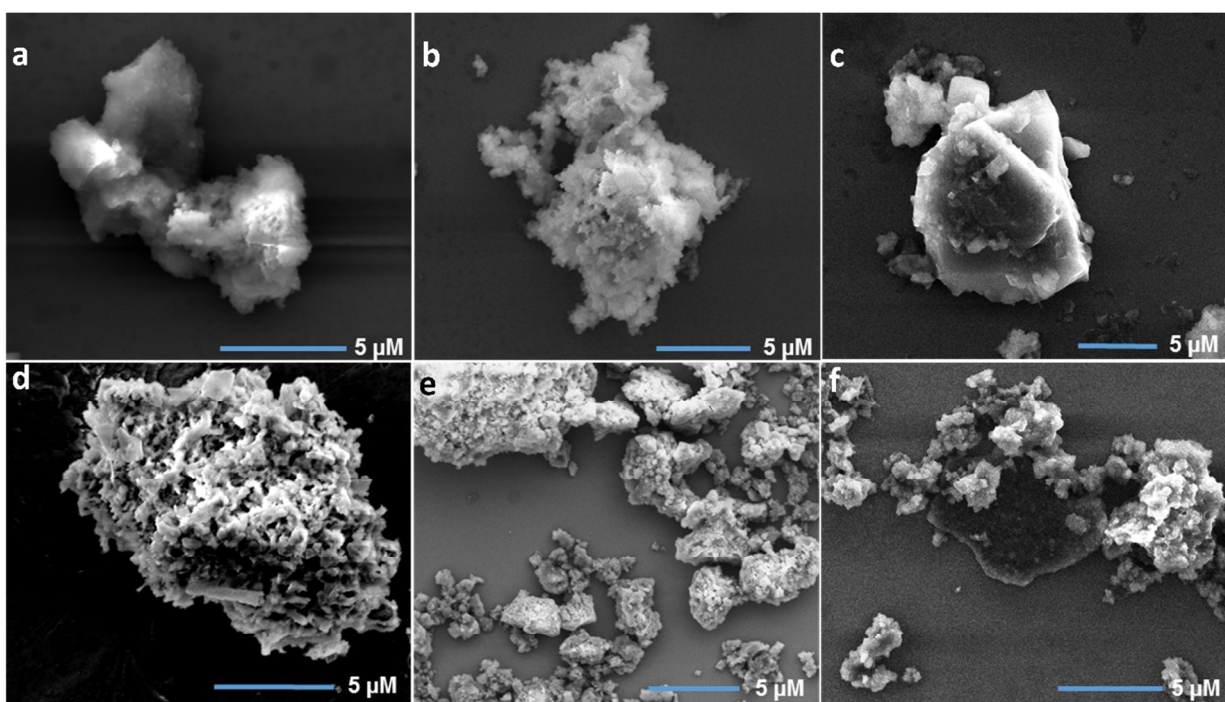

**Figure S3.** Low-magnification SEM images of **CalP2** (a), **CalP3** (b), and **CalP4** (c), **CalP2-Li** (d), **CalP3-Li** (e), and **CalP4-Li** (f); scale bar = 5  $\mu\text{m}$ . High-resolution.

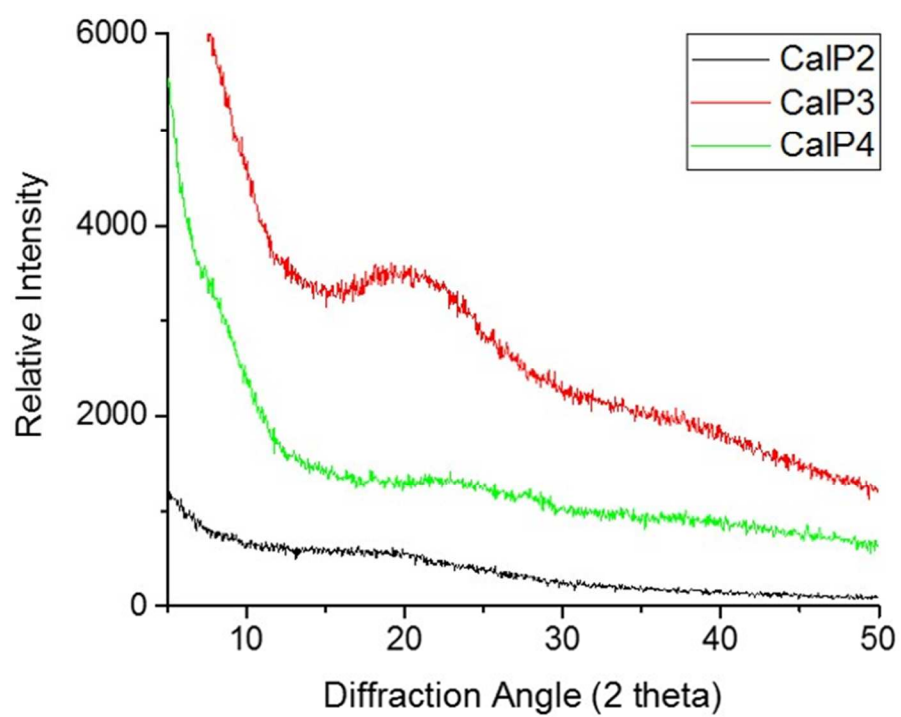

**Figure S4.** Powder X-ray diffraction (PXRD) pattern of **CalP2** (black), **CalP3** (red), and **CalP4** (green).

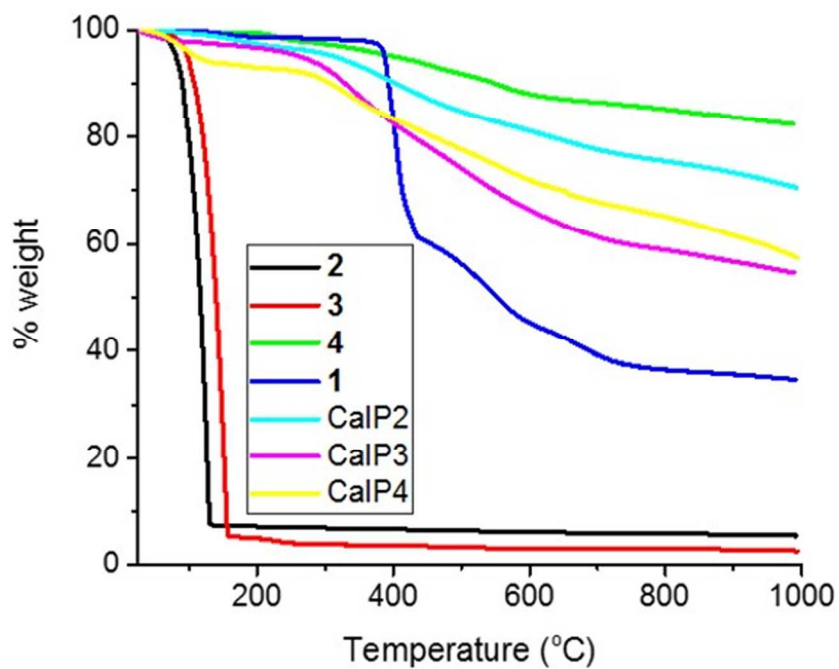

**Figure S5.** TGA plots for **CalP2** (green), **CalP3** (pink), **CalP4** (yellow), 1,4-diethynylbenzene (**2**, black), 1, 3, 5-triethynylbenzene (**3**, red), 1,3,6,8-Tetraethynylpyrene (**4**, green) and tetrabromocalix[4]arene (**1**, blue).

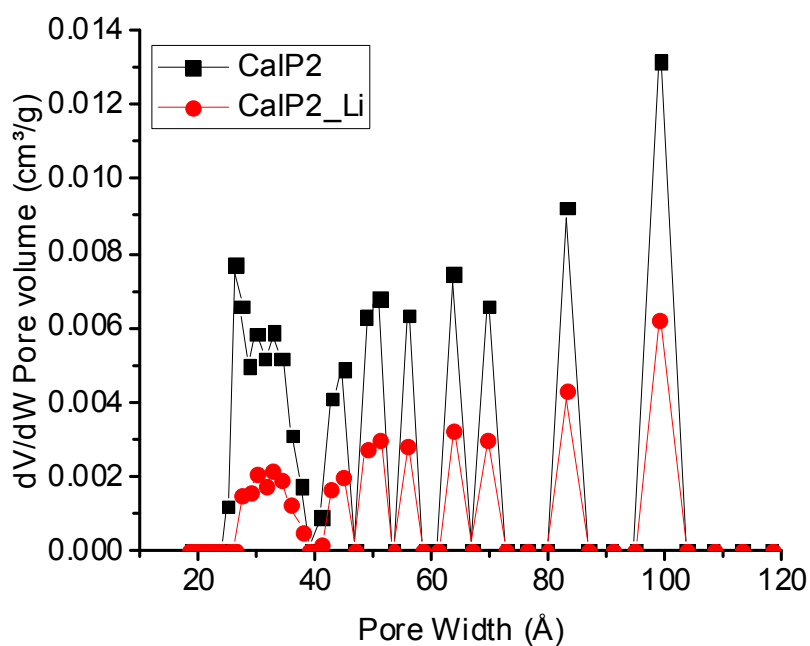

**Figure S6.** NLDT pore size distribution for **CalP2** and **CalP2-Li** determined from N<sub>2</sub> adsorption/desorption isotherms.

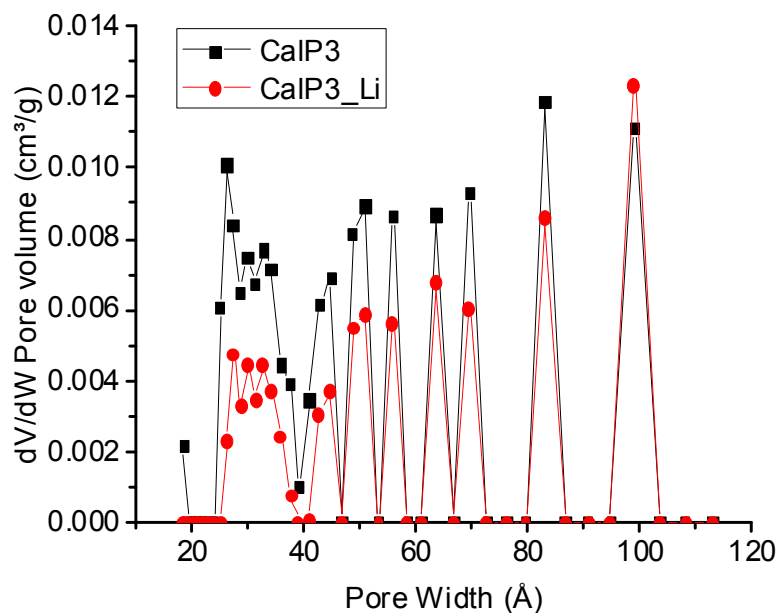

**Figure S7.** NLDT pore size distribution for **CalP3** and **CalP3-Li** determined from N<sub>2</sub> adsorption/desorption isotherms.

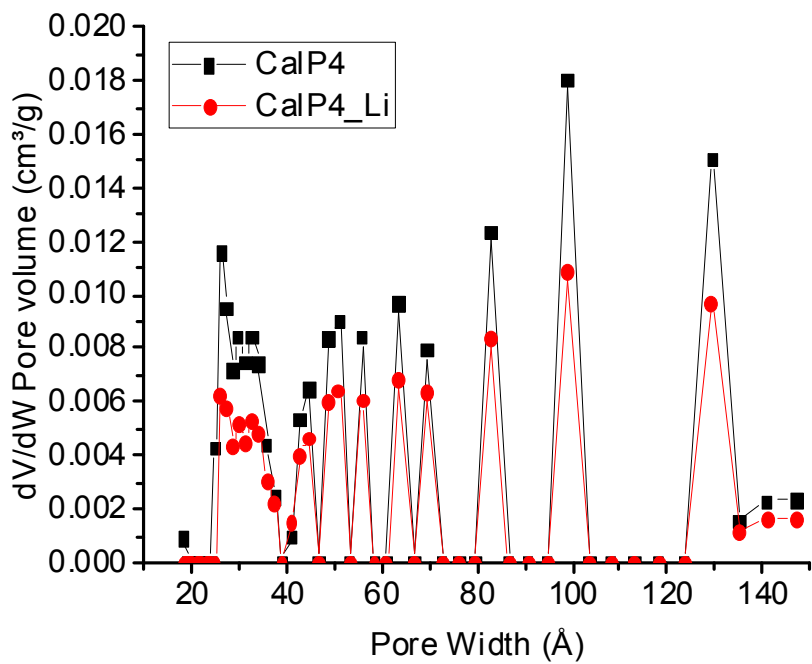

**Figure S8.** NLDFT pore size distribution for **CalP3** and **CalP3-Li** determined from N<sub>2</sub> adsorption/desorption isotherms.

**Iodine capture and recycling measurement.** Samples were prepared as follows: 25 mg of polymeric powder was placed in glass petri which was placed in a sealed glass chamber containing solid iodine flakes which were placed below the top level of the petri dish. The chamber with sample was placed on pre-heated (348 K) sand bath at ambient pressure and continued heating at same temperature. After adsorption of the iodine vapor over (for 0-24 h), the I<sub>2</sub>-loaded powder was cooled to room temperature and weighed. Iodine uptake capacity was calculated as follows:  $C_u = (W_2 - W_1)/W_1 \times 100$  wt %, with  $C_u$  being the iodine uptake capacity and  $W_1$  and  $W_2$  being mass of the polymer before and after adsorption, respectively. Recycling of the polymer was performed by washing the I<sub>2</sub>-loaded polymer repeatedly with 10 mL aliquots of EtOH. Iodine release was monitored by UV-visible analysis of the EtOH solution. After complete release of I<sub>2</sub>, the recovered polymer was dried and used again for iodine adsorption.

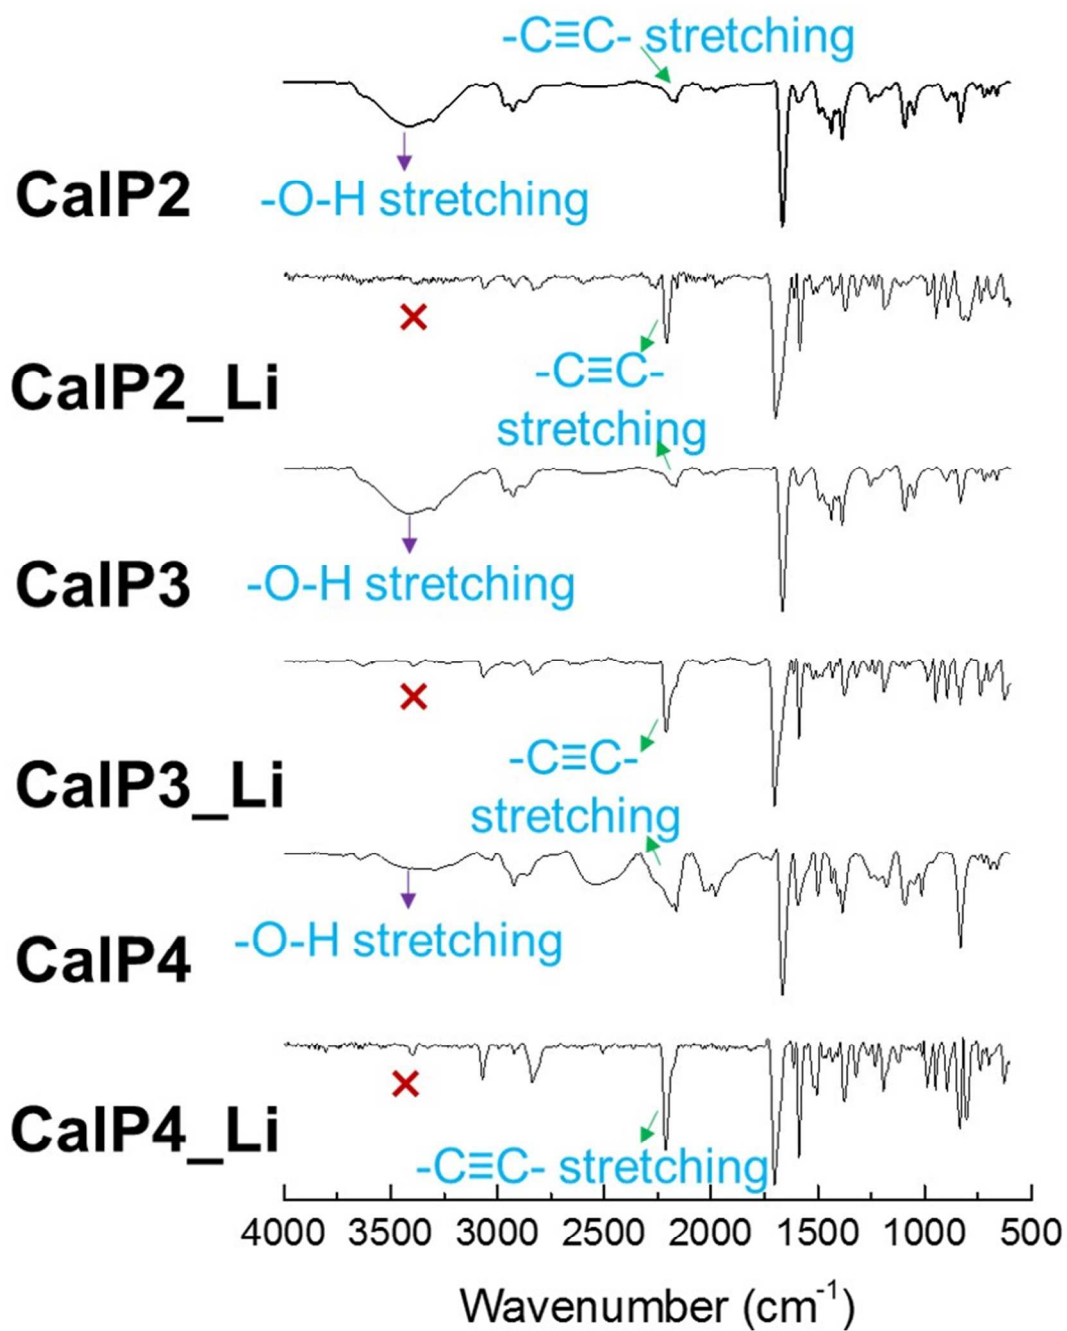

**Figure S9.** FTIR spectra of CalP2, CalP3, CalP4, and their corresponding lithiated polymers (CalP2-Li, CalP3-Li, and CalP4-Li).

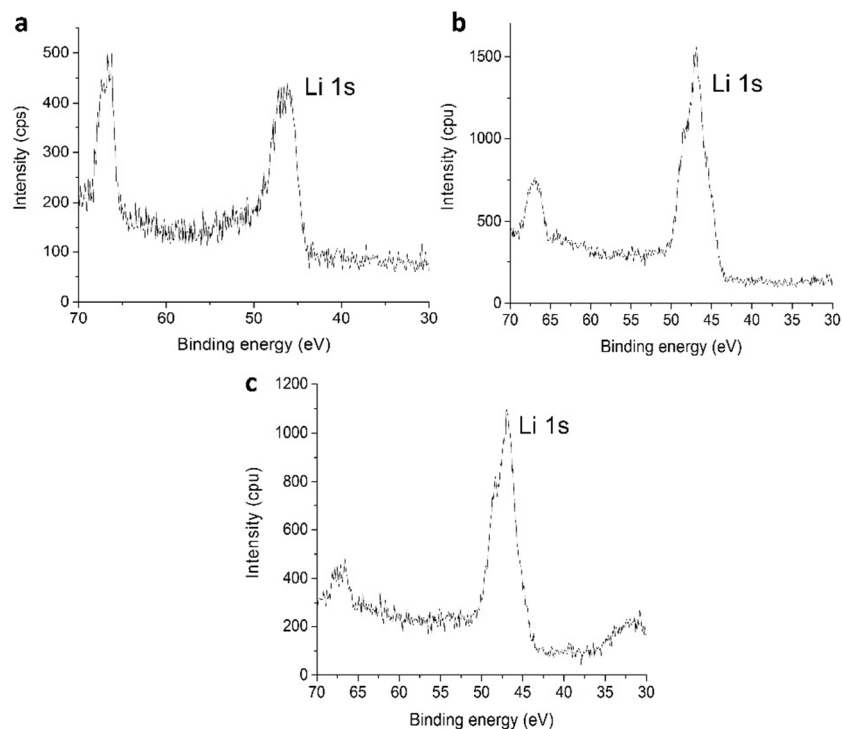

**Figure S10.** XPS spectrum of CalP2-Li (a), CalP3-Li (b) and CalP4-Li (c)

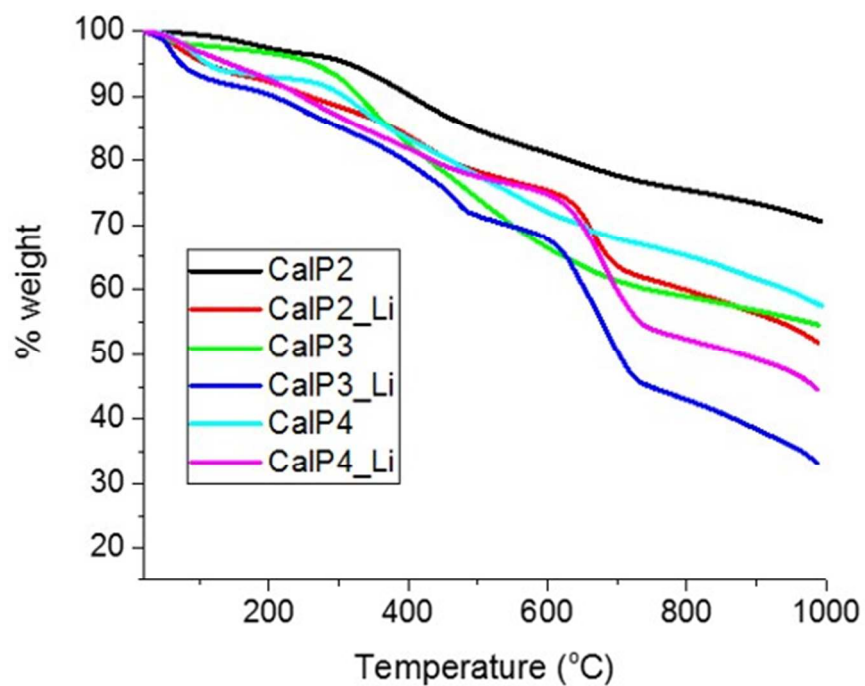

**Figure S11.** TGA plots for CalP2 (black), CalP2-Li (red), CalP3 (green), CalP3-Li (blue), CalP4 (magenta) and CalP4-Li (pink).

**Table S1:** Comparison of iodine uptake capacities of our materials with those of other reported materials.

| Material                                                                                                                                  | Sorption method              | Adsorption time               | Temp. (K) | I <sub>2</sub> vapor uptake (wt %) | Reference                                                    |
|-------------------------------------------------------------------------------------------------------------------------------------------|------------------------------|-------------------------------|-----------|------------------------------------|--------------------------------------------------------------|
| PAF-1                                                                                                                                     | Fixed vapor pressure         | 10 h (In n-hexane)            | 333       | 74.2                               | <i>J. Mater. Chem. A</i> , <b>2014</b> , 2, 7179-7187        |
| JUC-Z2                                                                                                                                    | Vacuum swing adsorption      | 10 h (In nhexane)             | 298       | 59.0                               | <i>J. Mater. Chem. A</i> , <b>2014</b> , 2, 7179-7187        |
| JUC-Z2                                                                                                                                    | Fixed vapor pressure         | 10 h (In nhexane)             | 333       | 80.4                               | <i>J. Mater. Chem. A</i> , <b>2014</b> , 2, 7179-7187        |
| {[Zn <sub>3</sub> (DLlac) <sub>2</sub> (pybz) <sub>2</sub> ]·2.5DMF} <sub>n</sub>                                                         | Vapor adsorption/Cyclohexane | 90min(Vapor) 48h(Cyclohexane) | -         | 82.6                               | <i>J. Am. Chem. Soc.</i> <b>2010</b> , 132, 2561–2563        |
| PAF-24                                                                                                                                    | Vapor adsorption/Cyclohexane | 48h(Vapor) 72h (cyclohexane)  | 348       | 276                                | <i>Angew. Chem. Int. Ed.</i> <b>2015</b> , 54, 12733 – 12737 |
| Azo-Trip                                                                                                                                  | Vapor adsorption/Cyclohexane | 48h (Vapor) 36h(cyclohexane)  | 350       | 233                                | <i>Polym. Chem.</i> , <b>2016</b> , 7, 643–647               |
| NiP-CMP                                                                                                                                   | Vapor adsorption/Cyclohexane | 48h (Vapor) 24h (cyclohexane) | 350       | 202                                | <i>Chem. Commun.</i> , <b>2014</b> , 50, 8495-8498           |
| [Mo <sub>3</sub> S <sub>13</sub> ]                                                                                                        | Vapor                        | 24 h                          | 333       | 100                                | <i>J. Am. Chem. Soc.</i> <b>2015</b> , 137, 13943–13948      |
| Sb <sub>4</sub> Sn <sub>3</sub> S <sub>12</sub> , Zn <sub>2</sub> Sn <sub>2</sub> S <sub>6</sub> , and K <sub>0.16</sub> CoS <sub>x</sub> | Vapor                        | 48h                           | 348       | 225                                | <i>Chem. Mater.</i> <b>2015</b> , 27, 2619–2626              |
| (BEA) <sub>2</sub> [PbBr <sub>4</sub> ]                                                                                                   | Vapor                        | 4-72h                         | 313       | 43                                 | <i>Angew. Chem. Int. Ed.</i> <b>2014</b> , 53, 1039–1042     |
| SCMP-II                                                                                                                                   | Vapor                        | 60 min                        | 353       | 345                                | <i>Chem. Commun.</i> <b>2016</b> , 52, 9797-9800             |
| HCMP-3                                                                                                                                    | Vapor                        | 40 min                        | 358       | 336                                | <i>Macromolecules</i> <b>2016</b> , 49, 6322-6333            |
| COP-Series                                                                                                                                | Vapor/Cyclohexane            | 3-5 min                       | 333       | 195-380                            | <i>J. Mater. Chem. A</i> , <b>2016</b> , 4, 15361-15369      |
| TTPB                                                                                                                                      | Vapor                        | 12 h                          | 350       | 443                                | <i>J. Mater. Chem. A</i> , <b>2017</b> , 5, 7612-7617        |
| CalP2                                                                                                                                     | Vapor/hexane                 | 8h                            | 343       | 88                                 | <i>This work</i>                                             |
| CalP3                                                                                                                                     | Vapor/hexane                 | 8h                            | 343       | 196                                | <i>This work</i>                                             |
| CalP4                                                                                                                                     | Vapor/hexane                 | 8h                            | 343       | 220                                | <i>This work</i>                                             |
| CalP2_Li                                                                                                                                  | Vapor/hexane                 | 6h                            | 343       | 108                                | <i>This work</i>                                             |
| CalP3_Li                                                                                                                                  | Vapor/hexane                 | 2h                            | 343       | 248                                | <i>This work</i>                                             |



|          |              |        |     |     |                  |
|----------|--------------|--------|-----|-----|------------------|
| CalP4_Li | Vapor/hexane | 30 min | 343 | 312 | <i>This work</i> |
|----------|--------------|--------|-----|-----|------------------|

**N.B:** Equilibrium uptake in weight (%)  $\alpha = (m_2 - m_1)/m_1 \times 100$  wt%,  $m_1$  = Sample mass and  $m_2$  = (Sample + iodine) mass.

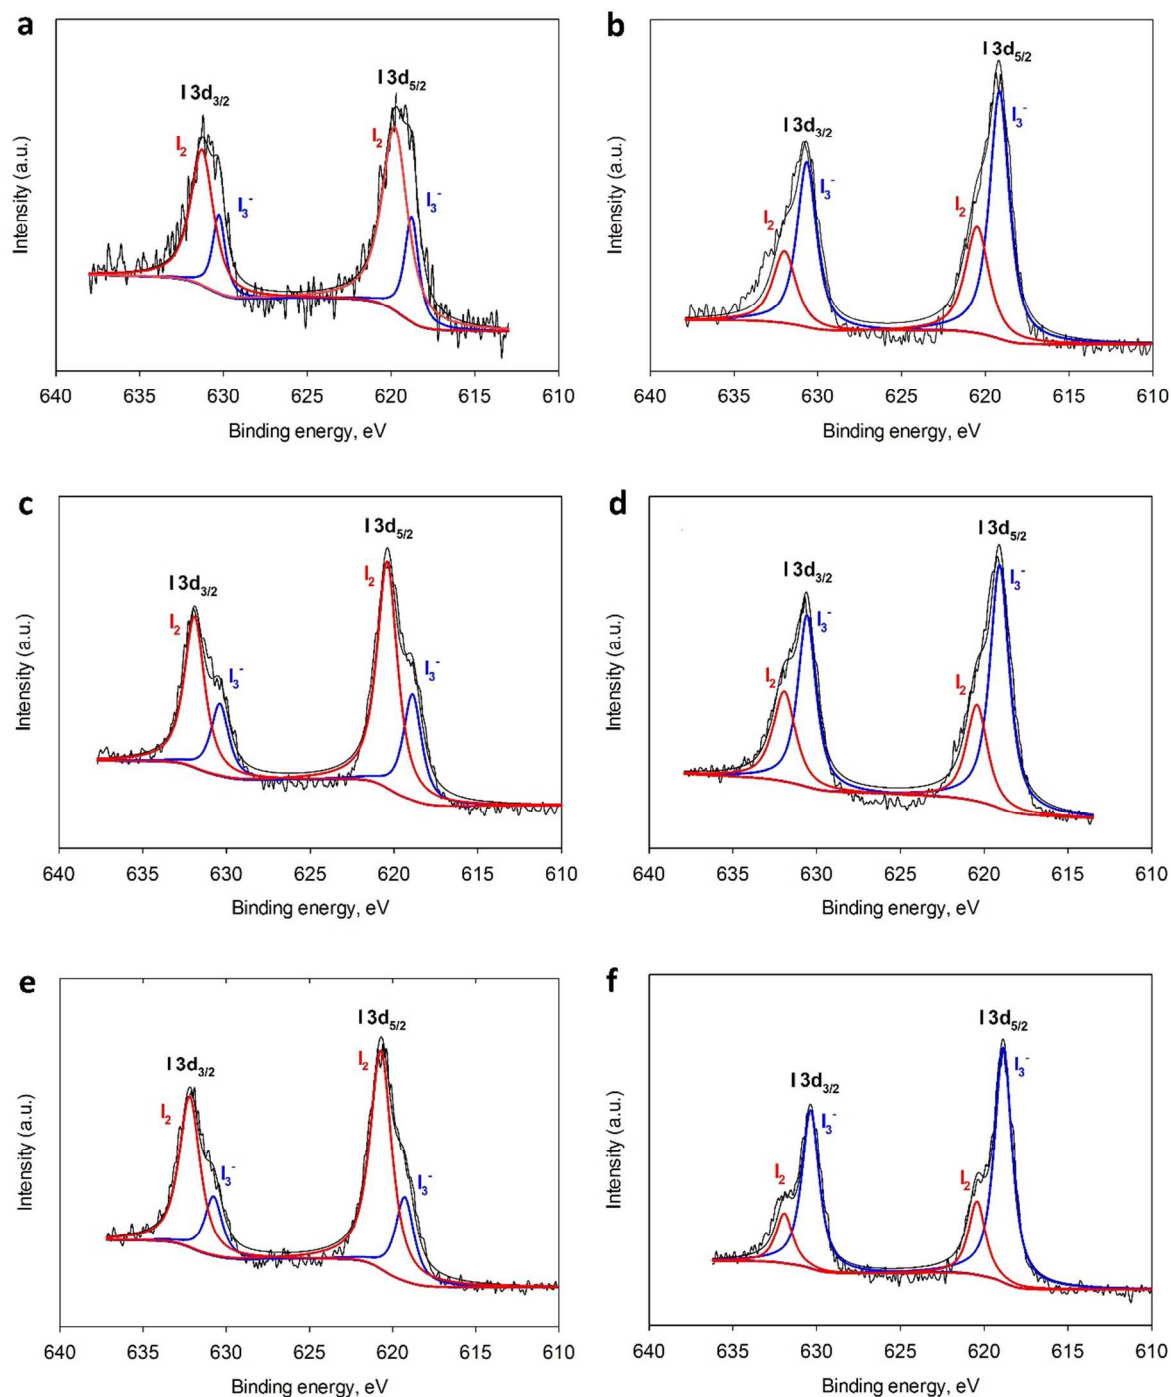

**Figure S12.** Deconvoluted XPS spectra of I<sub>2</sub>-loaded **CalP2** (a), **CalP2-Li** (a), **CalP3** (c), **CalP3-Li** (d), **CalP4** (e) and **CalP4-Li** (f). Region of interest is iodine potential.

| Sample   | S.O.S <sup>*</sup>  | O.S.I <sup>**</sup>         | B.E. (eV) | FWHM <sup>***</sup> | Area  | % Area | I <sub>2</sub> /I <sub>3</sub> <sup>-</sup> |
|----------|---------------------|-----------------------------|-----------|---------------------|-------|--------|---------------------------------------------|
| CalP2-Li | I 3d <sub>3/2</sub> | I <sub>2</sub>              | 631.9     | 1.67                | 3028  | 13.7   | 0.52                                        |
|          |                     | I <sub>3</sub> <sup>-</sup> | 630.7     | 1.40                | 5809  | 26.3   |                                             |
|          | I 3d <sub>5/2</sub> | I <sub>2</sub>              | 620.5     | 1.70                | 4542  | 20.6   |                                             |
|          |                     | I <sub>3</sub> <sup>-</sup> | 619.2     | 1.40                | 8715  | 39.4   |                                             |
| CalP3-Li | I 3d <sub>3/2</sub> | I <sub>2</sub>              | 631.9     | 1.58                | 4789  | 17.0   | 0.51                                        |
|          |                     | I <sub>3</sub> <sup>-</sup> | 630.6     | 1.29                | 7428  | 26.4   |                                             |
|          | I 3d <sub>5/2</sub> | I <sub>2</sub>              | 620.4     | 1.48                | 4788  | 17.0   |                                             |
|          |                     | I <sub>3</sub> <sup>-</sup> | 619.1     | 1.37                | 11143 | 39.6   |                                             |
| CalP4-Li | I 3d <sub>3/2</sub> | I <sub>2</sub>              | 631.9     | 1.19                | 1762  | 9.30   | 0.30                                        |
|          |                     | I <sub>3</sub> <sup>-</sup> | 630.4     | 1.25                | 5799  | 30.8   |                                             |
|          | I 3d <sub>5/2</sub> | I <sub>2</sub>              | 620.4     | 1.22                | 2644  | 13.9   |                                             |
|          |                     | I <sub>3</sub> <sup>-</sup> | 618.8     | 1.26                | 8699  | 46.0   |                                             |
| CalP2    | I 3d <sub>3/2</sub> | I <sub>2</sub>              | 631.3     | 1.64                | 1867  | 30.3   | 3.13                                        |
|          |                     | I <sub>3</sub> <sup>-</sup> | 630.3     | 0.9                 | 597   | 9.69   |                                             |
|          | I 3d <sub>5/2</sub> | I <sub>2</sub>              | 619.8     | 1.82                | 2802  | 45.5   |                                             |
|          |                     | I <sub>3</sub> <sup>-</sup> | 618.8     | 1.02                | 896   | 14.5   |                                             |
| CalP3    | I 3d <sub>3/2</sub> | I <sub>2</sub>              | 631.9     | 1.45                | 7362  | 28.2   | 2.39                                        |
|          |                     | I <sub>3</sub> <sup>-</sup> | 630.4     | 1.27                | 3097  | 11.8   |                                             |
|          | I 3d <sub>5/2</sub> | I <sub>2</sub>              | 620.4     | 1.46                | 11044 | 42.3   |                                             |
|          |                     | I <sub>3</sub> <sup>-</sup> | 618.9     | 1.31                | 4646  | 17.7   |                                             |
| CalP4    | I 3d <sub>3/2</sub> | I <sub>2</sub>              | 632.2     | 1.50                | 5764  | 29.9   | 2.96                                        |
|          |                     | I <sub>3</sub> <sup>-</sup> | 630.8     | 1.27                | 1929  | 10.1   |                                             |
|          | I 3d <sub>5/2</sub> | I <sub>2</sub>              | 620.7     | 1.56                | 8647  | 44.9   |                                             |
|          |                     | I <sub>3</sub> <sup>-</sup> | 619.3     | 1.35                | 2894  | 15.1   |                                             |

\*S.O.S = Spin-orbit splitting

\*\*O.S.I = Oxidation states of iodine

\*\*\*FWHM = Full width at half-maximum of a peak

**Table S2.** Summary of I 3d XPS spectra of solid samples

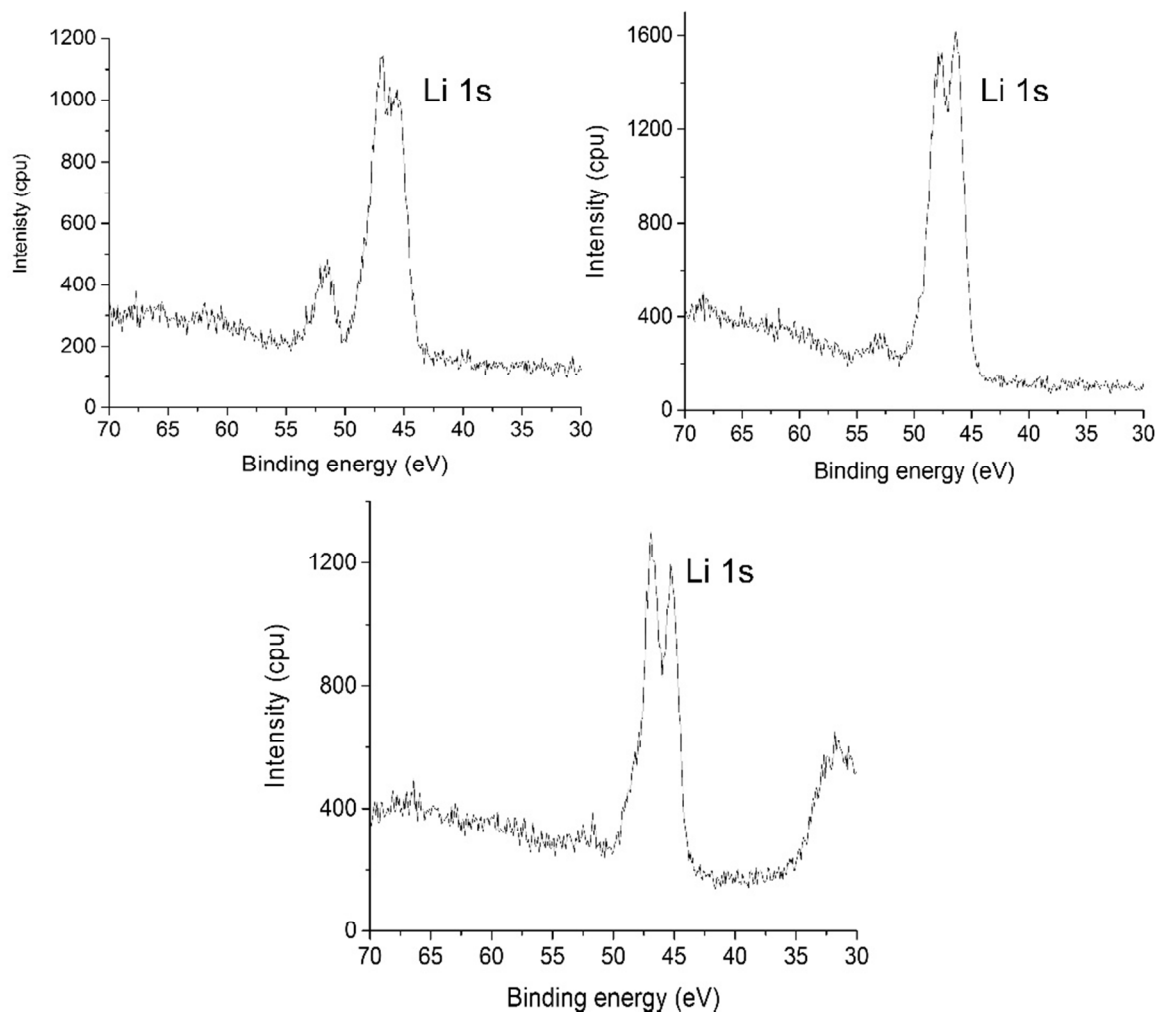

**Figure S13.** XPS spectrum of I<sub>2</sub>-loaded **CalP2** (a), **CalP2-Li** (a), **CalP3** (c), **CalP3-Li** (d), **CalP4** (e) and **CalP4-Li** (f). Region of interest is lithium potential.

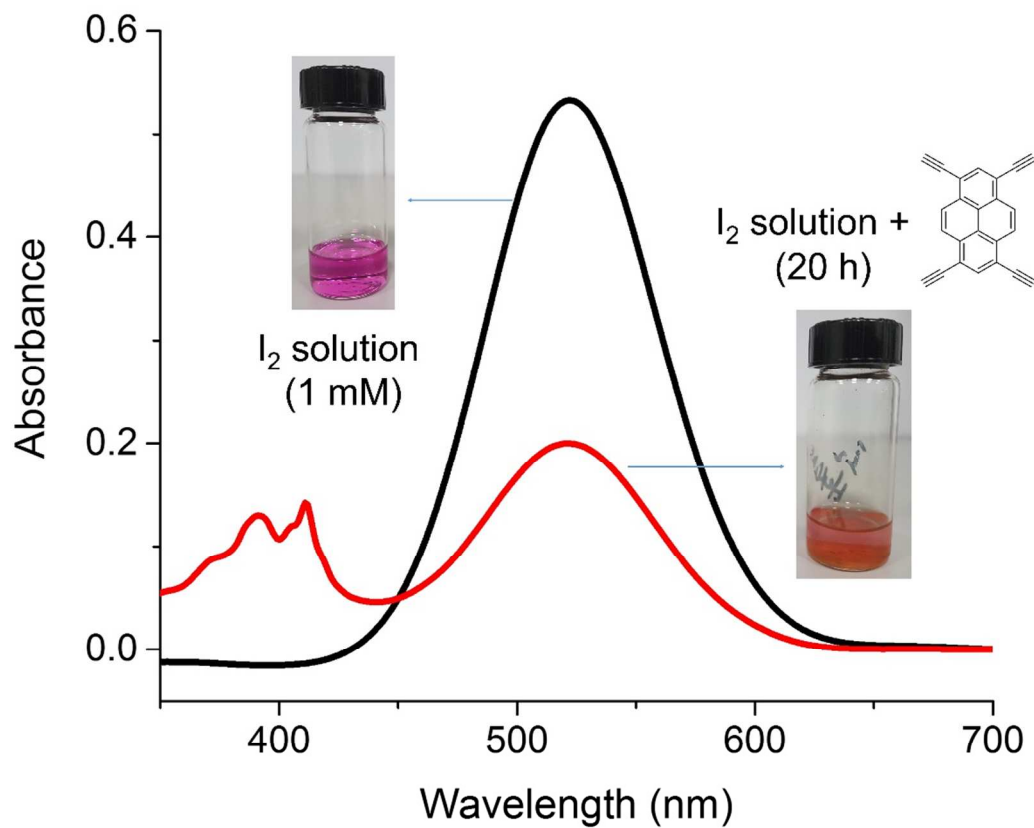

**Figure S14.** UV-visible absorption spectra of  $I_2$  stock solution (1 mM in hexane) before and after treating with **4**. UV-intensity of the  $I_2$  solution soaked with **4** was decreased mainly due to the interactions between pi-surface of **4** and  $I_2$  molecules.

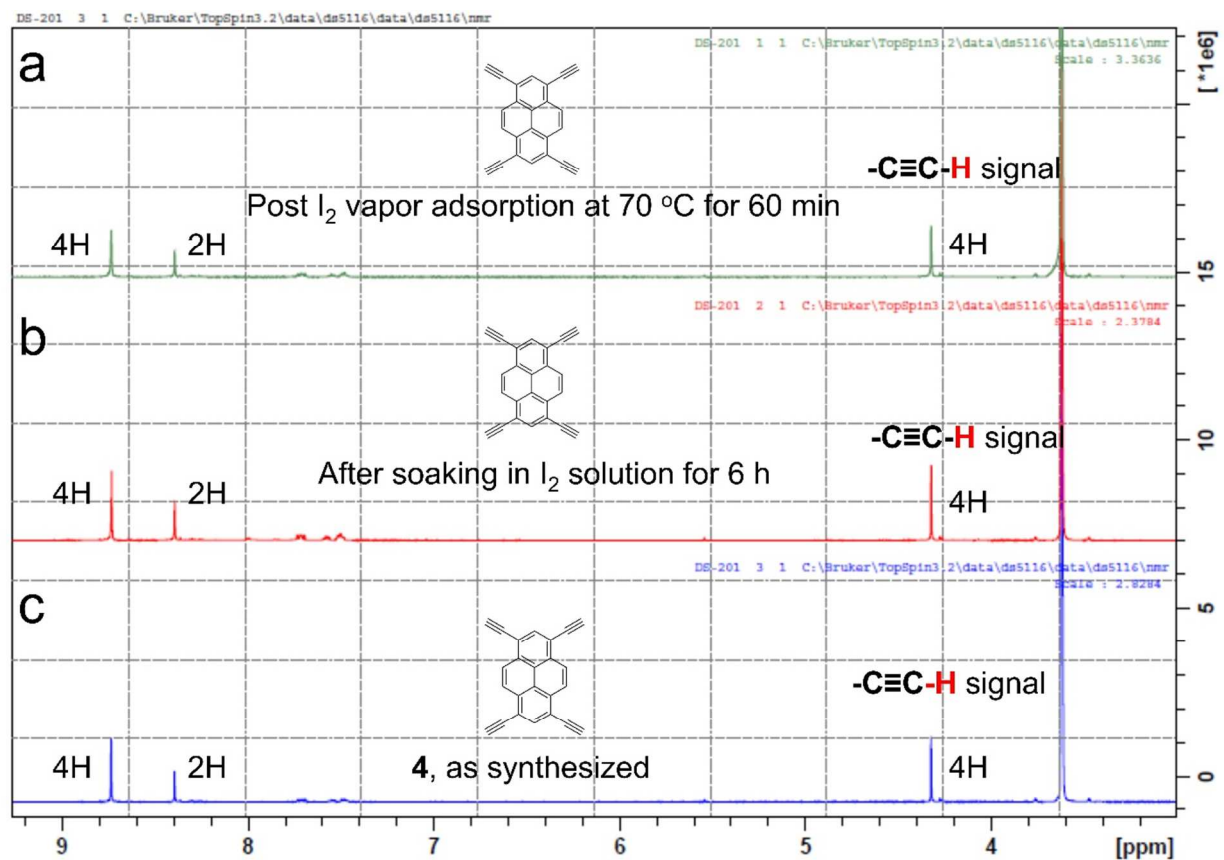

**Figure S15.**  $^1\text{H}$  NMR spectra (500 MHz,  $\text{THF-d}_8$ ) of (a) **4** after  $\text{I}_2$  vapor adsorption at 70°C for 60 min, (b) **4** after soaking in high concentration  $\text{I}_2$  solution in hexane, and (c) **4** as synthesized recorded at 298 K, respectively. There is no bond formation between acetylene bonds of **4** and  $\text{I}_2$ , which was indicated by intact  $-\text{C}\equiv\text{C}-\text{H}$  proton signals.

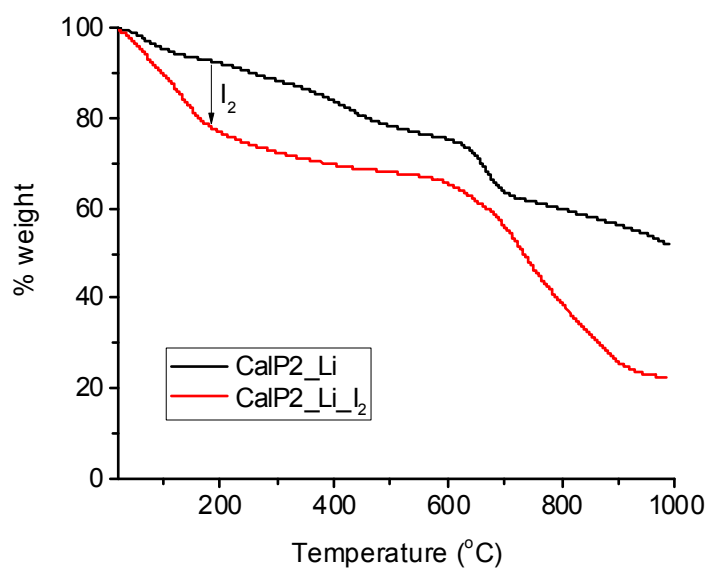

**Figure S16.** TGA plots for **CalP2-Li** before (black) and after (red) I<sub>2</sub> adsorption.

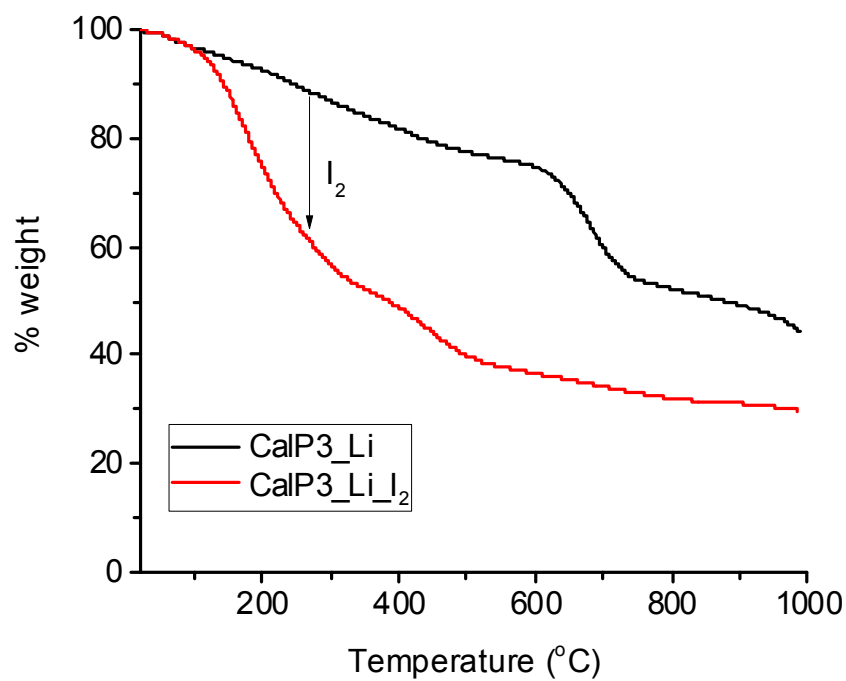

**Figure S17.** TGA plots for **CalP3-Li** before (black) and after (red) I<sub>2</sub> adsorption.

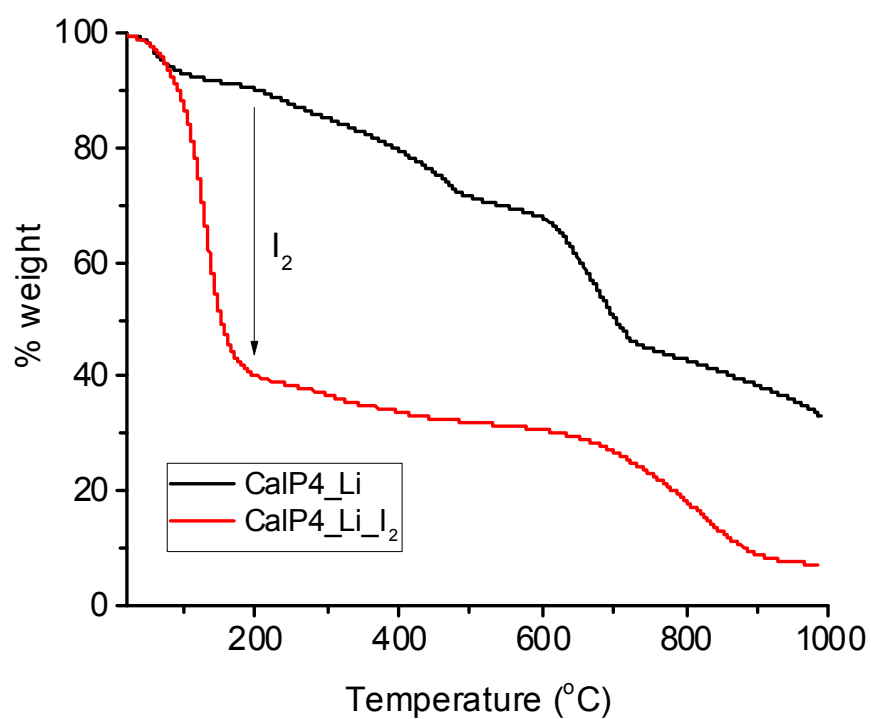

**Figure S18.** TGA plots for **CalP4-Li** before (black) and after (red) I<sub>2</sub> adsorption.

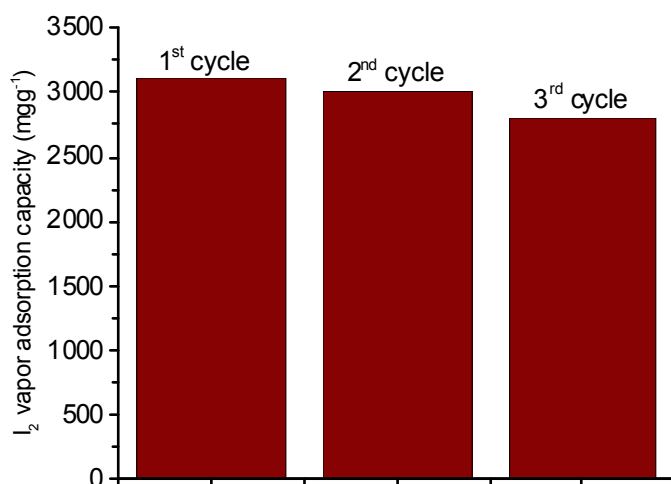

**Figure S19.** Recycling efficiency of **CalP4-Li** for I<sub>2</sub> vapor adsorption

## References

1. Clark, T. E.; Makha, M.; Sobolev, A. N.; Rohrs, H.; Atwood, J. L.; Raston, C. L., Engineering nanorrafts of calixarene polyphosphonates. *Chem. Eur. J.* **2008**, 14, (13), 3931-3938.
2. Venkataramana, G.; Sankararaman, S., Synthesis, Absorption, and Fluorescence-Emission Properties of 1, 3, 6, 8-Tetraethynylpyrene and Its Derivatives. *Eur. J. Org. Chem.* **2005**, (19), 4162-4166.
